# Supplementary material for: Cardioprotective effects of Prolame and SNAP are related with nitric oxide production and with diminution of caspases and calpain-1 activities in reperfused rat hearts
Source: PeerJ. 2019 Jul 29;7:e7348. doi: 10.7717/peerj.7348 (PMC6673759; doi:10.7717/peerj.7348)
Supplement: Supplemental Information 1 — Data indicate measurements obtained from least three independent heart preparations per group. [file peerj-07-7348-s001.xlsx]

## Sheet: Double product
Time (min)	Double product of the Control group
0	24138	24928	23166	25025	26117	24338	21409	24166
10	21684	25536	20276	25756	28028	23323	23166	22386
20	19975	23814	21964	25920	26696	22878	23452	21725
30	20169	21216	20925	24380	26558	22632	23370	22825
40	21238	22752	20100	23674	26400	22632	23856	22825
50	19352	20088	20325	23055	27072	23074	22761	23436
60	23885	22480	21736	23144	26117	22113	22599	23240
70	21789	19344	20444	23848	26026	21680	22878	23604
80	20992	19656	21016	23375	25389	21725	22680	23520
90	23571	19987	19053	23838	25668	21520	23206	23124
100	20992	23478	19272	23838	25290	22140	23288	23288
110	22714	22680	18834	23306	25662	22222	22515	22640
Time (min)	Double product of the I-R group
0	24386	26117	23328	25025	26117	24338	20700	23772
10	24288	22102	22308	25756	28028	22761	22160	23736
20	27166	22825	20976	25920	26696	21708	22437	23564
30	0	0	0	0	0	0	0	0
40	0	0	0	0	0	0	0	0
50	0	0	0	0	0	0	0	0
60	3630	4028	3276	7128	2889	7008	6156	8610
70	2150	5236	4819	2730	3432	4654	7216	7980
80	2079	4183	3976	5973	5440	4480	6300	4550
90	1752	2760	2660	5456	3750	4554	5249	4224
100	2800	2205	1512	5104	4239	3960	6256	5336
110	2356	2048	5621	7627	3900	4462	5434	5792
Time (min)	Double product of the I-R+Prolame group
0	24354	23661	25844	22825	23247	20448	20700	22074
10	23738	19837	23572	23290	24816	22407	19944	19872
20	23392	20995	22000	23220	23323	20202	19980	19028
30	0	0	0	0	0	0	0	0
40	0	0	0	0	0	0	0	0
50	0	0	0	0	0	0	0	0
60	16936	21646	24386	18864	16443	20002	20355	15004
70	18942	21726	21386	19944	18070	16920	17360	17050
80	17538	21238	19836	20550	16653	17319	15789	19175
90	17316	22496	19564	19635	16317	18288	15718	15456
100	16786	21797	20368	19327	15246	17395	15618	14934
110	17556	20520	19418	18450	17292	16077	14649	14455
Time (min)	Double product of the I-R+SNAP group
0	23296	26754	30805	20805	21904	22542	20550	21789
10	25840	27990	28608	21918	22386	21300	20350	21962
20	24436	29391	27636	22140	23987	21243	19099	22878
30	0	0	0	0	0	0	0	0
40	0	0	0	0	0	0	0	0
50	0	0	0	0	0	0	0	0
60	23108	31458	27063	19389	24900	21225	21138	21684
70	26215	28120	25116	20300	23946	20596	23384	23120
80	28912	30876	26864	21240	23236	21600	23571	23814
90	31164	28119	28809	24486	22680	20436	23520	21660
100	29252	28227	29898	23940	24354	19200	21128	21730
110	28078	26730	26402	22052	22989	19092	21172	21138

## Sheet: Infarct size
	Control	I-R	I-R+Prolame	I-R+SNAP
Infarct Size/Area At Risk	8.74	53.7	8	4.66
	3.7	51.49	7.26	2
	6.3	58.1	11	11.3
	8.2	61.1	10.5	6.42
	3.94	57	8.4	8.31

## Sheet: Nitrite content
	Control	I-R	I-R+Prolame	I-R+SNAP	I-R+Prolame+ODQ	I-R+Prolame+L-NAME	I-R+SNAP+ODQ
nmol nitrite/mg protein	45.4139	3.616	77.898	114.697	73.7263	21.0658	90.0649
	45.3768	4.81168	85.7429	118.777	68.9808	28.5353	81.1476
	33.8002	3.04053	88.9012	129.034	68.5617	24.9899	87.0474

## Sheet: Heart rate with inhibitors
Time (min)	Beats per minute of the I-R group
0	274	287	288	275	287
10	264	257	286	274	286
20	289	275	276	270	284
30	0	0	0	0	0
40	0	0	0	0	0
50	0	0	0	0	0
60	66	106	78	198	107
70	50	154	79	78	156
80	77	89	71	181	160
90	73	60	76	176	150
100	80	45	63	232	157
110	76	64	77	263	156
Time (min)	Beats per minute of the I-R+Prolame group
0	297	239	284	275	287
10	286	239	284	274	282
20	272	247	275	270	281
30	0	0	0	0	0
40	0	0	0	0	0
50	0	0	0	0	0
60	232	274	274	262	261
70	246	306	289	277	278
80	237	287	261	274	273
90	222	296	268	255	259
100	218	307	268	251	242
110	228	285	266	246	262
Time (min)	Beats per minute of the I-R+Prolame+ODQ group
0	284	254	301	265	251
10	297	239	294	255	236
20	286	239	294	269	271
30	0	0	0	0	0
40	0	0	0	0	0
50	0	0	0	0	0
60	204	231	213	244	219
70	232	214	194	201	213
80	216	226	201	218	194
90	217	229	199	198	188
100	192	226	198	206	176
110	198	227	199	195	173
Time (min)	Beats per minute of the I-R+Prolame+L-NAME group
0	268	231	234	267	251
10	250	283	183	256	219
20	255	232	258	261	206
30	0	0	0	0	0
40	0	0	0	0	0
50	0	0	0	0	0
60	147	178	165	185	183
70	172	154	122	131	194
80	170	147	73	156	179
90	167	168	123	154	180
100	163	169	126	174	184
110	162	171	129	167	168
Time (min)	Beats per minute of the I-R+SNAP group
0	256	294	305	285	296
10	304	311	298	281	287
20	298	303	294	270	289
30	0	0	0	0	0
40	0	0	0	0	0
50	0	0	0	0	0
60	218	321	279	281	300
70	245	296	276	290	307
80	278	332	292	295	314
90	294	309	297	318	280
100	284	291	302	315	297
110	278	297	307	298	291
Time (min)	Beats per minute of the I-R+SNAP+ODQ group
0	285	294	250	267	294
10	203	276	235	256	283
20	287	237	218	261	207
30	0	0	0	0	0
40	0	0	0	0	0
50	0	0	0	0	0
60	257	226	309	185	217
70	300	235	227	179	255
80	299	251	256	191	260
90	267	246	241	154	239
100	291	249	245	193	234
110	282	252	236	167	219

## Sheet: LVDP with inhibitors
Time (min)	mmHg of the I-R group
0	89	91	81	91	91
10	92	86	78	94	98
20	94	83	76	96	94
30	0	0	0	0	0
40	0	0	0	0	0
50	0	0	0	0	0
60	55	38	42	36	27
70	43	34	61	35	22
80	27	47	56	33	34
90	24	46	35	31	25
100	35	49	24	22	27
110	31	32	73	29	25
Time (min)	mmHg of the I-R+Prolame group
0	82	99	91	83	81
10	83	83	83	85	88
20	86	85	80	86	83
30	0	0	0	0	0
40	0	0	0	0	0
50	0	0	0	0	0
60	73	79	89	72	63
70	77	71	74	72	65
80	74	74	76	75	61
90	78	76	73	77	63
100	77	71	76	77	63
110	77	72	73	75	66
Time (min)	mmHg of the I-R+Prolame+ODQ group
0	83	90	81	82	79
10	82	85	77	72	77
20	77	79	77	79	79
30	0	0	0	0	0
40	0	0	0	0	0
50	0	0	0	0	0
60	56	55	64	60	67
70	64	53	59	51	68
80	61	55	58	61	53
90	62	59	60	63	52
100	59	58	56	61	59
110	61	58	55	63	56
Time (min)	mmHg of the I-R+Prolame+L-NAME group
0	89	81	81	86	79
10	84	75	79	87	71
20	81	78	68	84	62
30	0	0	0	0	0
40	0	0	0	0	0
50	0	0	0	0	0
60	56	39	51	59	53
70	56	49	67	54	50
80	50	46	63	48	50
90	48	35	64	49	55
100	44	40	64	47	52
110	39	38	64	44	44
Time (min)	mmHg of the I-R+SNAP group
0	91	91	101	73	74
10	85	90	96	78	78
20	82	97	94	82	83
30	0	0	0	0	0
40	0	0	0	0	0
50	0	0	0	0	0
60	106	98	97	69	83
70	107	95	91	70	78
80	104	93	92	72	74
90	106	91	97	77	81
100	103	97	99	76	82
110	101	90	86	74	79
Time (min)	mmHg of the I-R+SNAP+ODQ group
0	81	74	71	86	85
10	73	76	69	87	82
20	71	67	58	84	79
30	0	0	0	0	0
40	0	0	0	0	0
50	0	0	0	0	0
60	76	60	52	79	61
70	77	71	61	84	68
80	70	76	74	76	71
90	63	73	73	79	70
100	65	71	76	81	77
110	62	70	79	75	78

## Sheet: Content of cGMP
	Control	I-R	I-R+Prolame	I-R+SNAP	I-R+Prolame +ODQ	I-R+Prolame +L-NAME	I-R+SNAP +ODQ
pmol cGMP/ml	17.2	0.32	30	16.9	4.3	1.2	0.32
	20	1.4	20.1	21.8	3.5	0.9	0.32
	23.6	1.4	22.8	20.2	1.6	2.1	1

## Sheet: Activity of proteases
	Activity of caspase-3
	Control	I-R	I-R+Prolame	I-R+SNAP
pmol pNA/ mg protein/ 60 min	187.6	275.3	218.7	124.8
	208.9	196.5	213.5	145.2
	183.7	243.1	246.6	209.4
	181.7	206	153	131.13
	164.4	223.8	171.3	144.8
	117.6	208.2	191.8	190.1
	Activity of caspase-8
	Control	I-R	I-R+Prolame	I-R+SNAP
pmol pNA/ mg protein/ 60 min	199.6	305.7	224	112.3
	187.5	252.9	201.1	149.2
	187.4	209.5	237.2	209.4
	191.2	229.3	147.7	139.9
	127.8	236.2	156.3	194
	152.9	253.2	175.4	226.8
	Activity of caspase-9
	Control	I-R	I-R+Prolame	I-R+SNAP
pmol pNA/ mg protein/ 60 min	185.4	295.8	197	110.7
	195.4	215.9	197.5	132.3
	176.1	218.6	225.9	201.1
	155.4	201.8	222.4	186.4
	118.7	209.6	171.8	183.9
	152	225.6	194.6	224.3
	Activity of calpain-1
	Control	I-R	I-R+Prolame	I-R+SNAP
Fold increase over control	1	1.46	1.08	0.88
	1.04	2.16	1.05	1.1
	1.15	1.65	1	1.18
	1.06	1.29	1.01	1.08
	1.06	1.2	1.08	1.08
	1	1.26	1.05	1.03
	1.18	1.64	1.1	0.99
	1	2.16	1.17	0.88
	1.04	1.65	1.05	0.95
	1.15		1	0.87

## Sheet: SNO of proteins
	SNO of caspase-3
	Control	I-R	I-R+Prolame	I-R+SNAP
SNO procasp-3/Total procasp-3	1.54	1.19	0.79	1.036
	2.65	0.088	1.102	0.528
	0.29091	0.73617	0.89072	0.63429
	SNO of calpain-1
	Control	I-R	I-R+Prolame	I-R+SNAP
SNO calpain-1/Total calpain-1	0.212671	0.479024	0.694523	1.15
	0.19305	0.176344	0.321614	1.27297
	0.062983	0.57152	0.402398	0.458215
	0.255265	0.347571	1.08251	0.660076
	1.18	0.849	1.12	0.293

## Sheet: TUNEL assay
	Control	I-R	I-R+Prolame	I-R+SNAP
Arbitrary fluorescence units	0.01	13.42	4.23	4.71
	0.01	10.58	5.07	5.09
	1.99	15.32	4.15	0.01
	4.99	15.68	2.89	0.04
	3.21	9.42	2.08	3.98
	3.03	11.58	2.74	6.14
	1.96	10.03	2.03	7.86
	2.19	12.17	3.62	8.72
	0.01	14.67	3.78	1.87
	3.58	16.53	1.07	2.32
	3.99	18.29	2.36	0.38
	0.01	17.71	1.03	2.84
	0.01	15.01	0.92	1.46
	1.99	14.99	3.83	0.09
	2.11	14.92	2.77	2.62

## Sheet: Western blot casp-3 and calp-1
	Caspase-3/Actin
	Control	I-R	I-R+Prolame	I-R+SNAP
	1.54	1.19	0.79	1.036
	2.65	0.088	1.102	0.528
	0.29091	0.73617	0.89072	0.63429
	Calpain-1/GAPDH
	Control	I-R	I-R+Prolame	I-R+SNAP
	0.473823	0.77542	0.831879	0.870266
	1.1	0.856753	1.03053	1.1337
	0.983726	1.06292	0.936583	0.836453
